# Supplementary material
Source: HighWire-hosted journal article supplement (https://cmaj.ca/highwire/filestream/146965/field_highwire_adjunct_files/0/212147-res-1-at.pdf)

## Appendix 1 – Our Health Counts Toronto and Our Health Counts London Network Diagrams

### Toronto

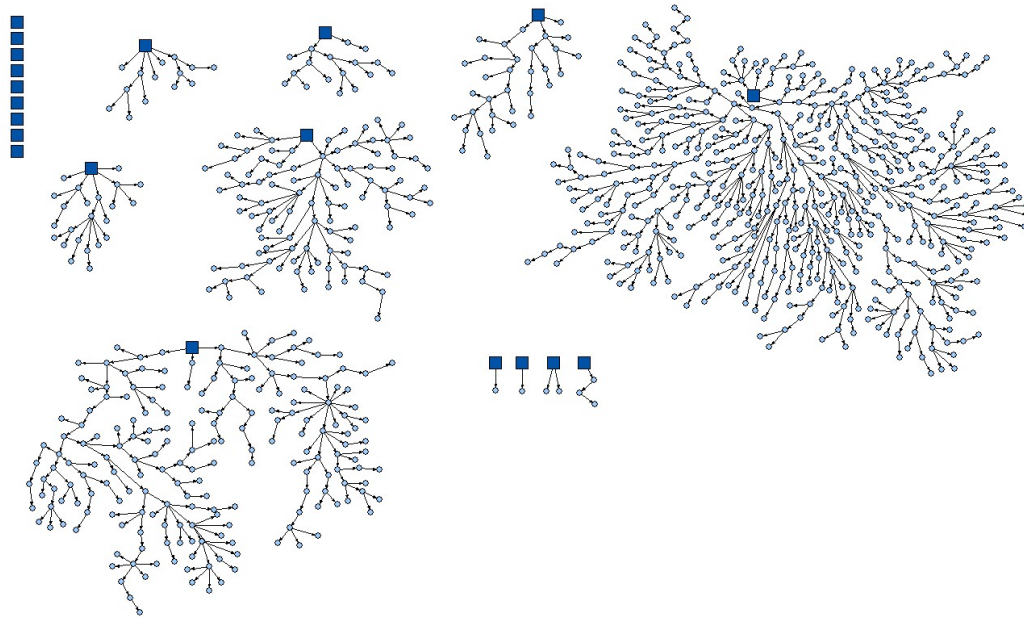

Figure reproduced from [Our Health Counts Toronto: using respondent-driven sampling to unmask census undercounts of an urban indigenous population in Toronto, Canada, Rotondi et al, volume number 7:12, e018936, 2022] with permission from BMJ Publishing Group Ltd

## London

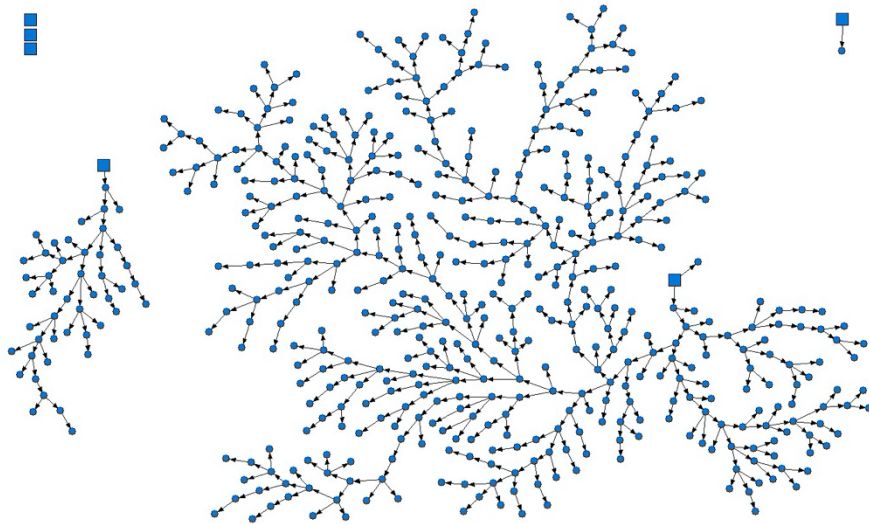

Supplement: 212147-res-1-at.pdf [file 212147-res-1-at.pdf]
